# Supplementary material
Source: publisher site journal article supplement (https://www.dovepress.com/article/106553)
Supplement: Supplementary file 1 [file get_supplementary_file.php]

### **Text S1: Chemical synthesis of IONPs**

In order to compare the biocompatibility of bio-IONPs with chemically synthesized IONPs, the magnetite nanoparticles were prepared via chemical co-precipitation method.  $\text{FeCl}_3 \cdot 6\text{H}_2\text{O}$  (2 mmol) and  $\text{FeCl}_2 \cdot 4\text{H}_2\text{O}$  (1mmol) were dissolved in Milli-Q water (150 mL) and heated to 85°. Then 20 mL of 25% ammonium hydroxide was added quickly in to the solution under vigorous stirring (800 rpm). Oleic acid (OA, 3 mL) was added after 30 minutes and the mixture was heated to 80°C for another hour. The resulting nanoparticles were collected from the solution by magnetic separation and washed several times with ethanol, then dried under vacuum conditions at 60°C for 4 hours.

The surface of the chemically synthesized iron oxide nanoparticles (C-IONPs) was modified by the dropwise addition of PEG-6000 (15  $\mu\text{L}$  of 1% w/v: 10 mg/mL) to the freshly prepared nanoparticle solution.

### **Text S2: Cell culture**

HeLa cells were maintained in Dulbecco's modified Eagle's medium (DMEM) supplemented with 10% heat inactivated fetal calf serum (GIBCO), penicillin (100 U/mL) and streptomycin (100  $\mu\text{g}/\text{mL}$ ) at the 37 °C in a humidified atmosphere containing 5%  $\text{CO}_2$ . Hela cells at a concentration of  $1.5 \times 10^5$  cells/mL were grown in a 25  $\text{cm}^2$  flask in culture medium.

### **Text S3: SRB assay**

Cells were inoculated in 96-well plate ( $10^5$  cells/well) for 48 hours before treatment with the compound(s). SPIONs were diluted with DMEM containing 10% FBS. Cells were

exposed to different dilutions (0-150 µg/mL) of the SPIONs by replacing the medium with fresh medium and incubated for 48 hours.

Cells were fixed (after incubation at 37°C and in atmosphere of 5% CO<sub>2</sub>) by gentle addition of 50% pre chilled trichloroacetic Acid (TCA) and incubated again at 4°C for 1hour. The assays plates were rinsed and dried with deionized water. After 48 hours cells were fixed, washed, and stained for 30 minutes with 0.4% (w/v) SRB dissolved in 1% acetic acid. Unbound dye was removed by four washes with 1% acetic acid, and attached stain was recovered with *tris*-EDTA (10 mM, pH 8.0) buffer. Colour intensity was measured in an ELISA reader at wavelength 540 nm.

#### **Text S4: Temperature measurements of SPIONs undergoing irradiation**

Different concentrations of SPIONs were added (1, 5 and 10 mg/mL) to water supplemented with 10% FBS, respectively. No HeLa cells were added. They were exposed to light for 10 minutes with temperature probe, and the rise in temperature was recorded with Eutech temperature probe at intervals of 1 minute at ambient environment. The control was also exposed to light without any nanoparticles.

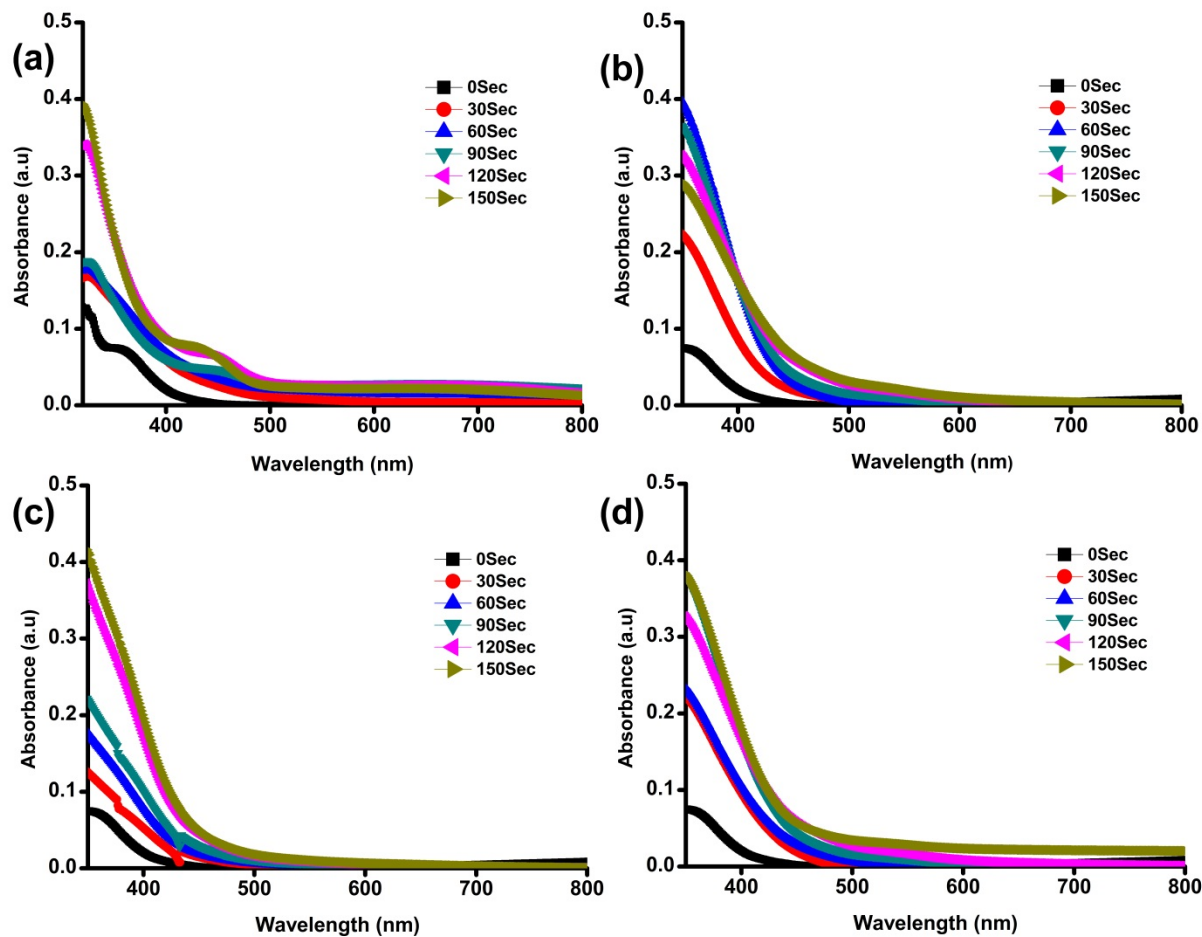

**Figure S1** UV-Visible spectra showing microwave assisted green synthesis of bio-SPIONs. Spectra were collected after every 30sec of MW irradiation for a total reaction time of 150sec. (a) PP-SPIONs (b) LP-SPIONs (c) OP-SPIONs and (d) AP-SPIONs.

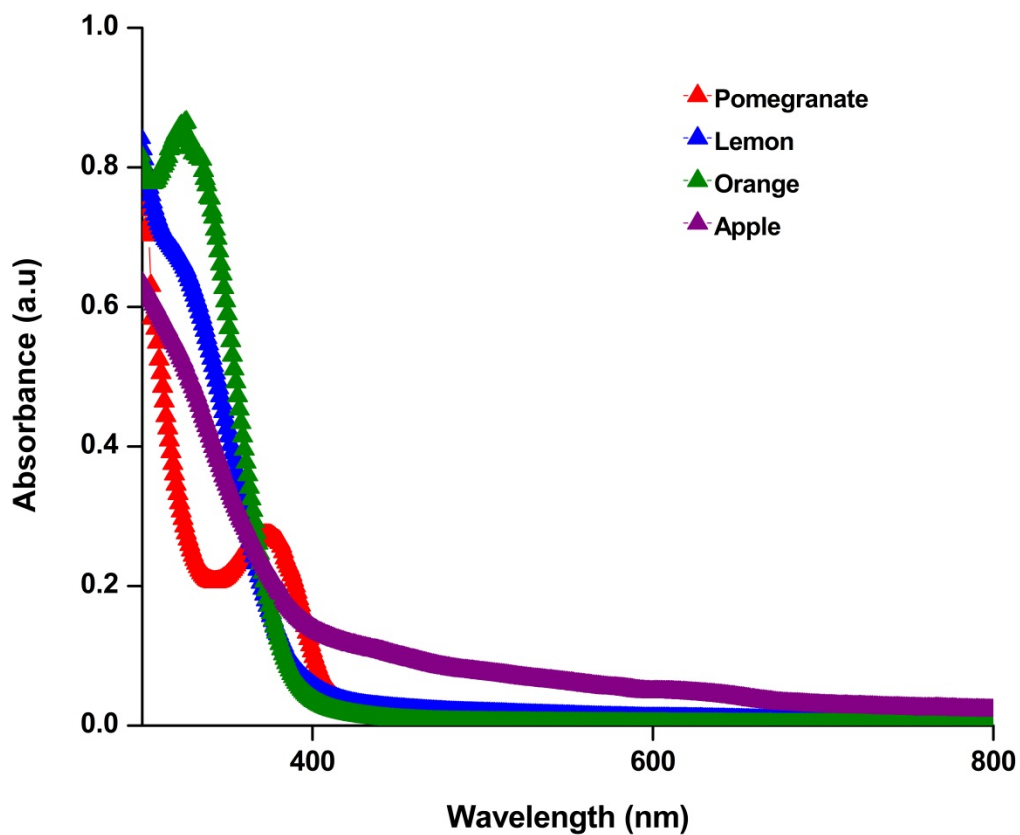

**Figure S2** UV-Vis spectrum of fruit extracts showing the maximum absorbance at 280nm (apple), 280nm (lemon), and 282 nm (orange), 373nm (pomegranate).

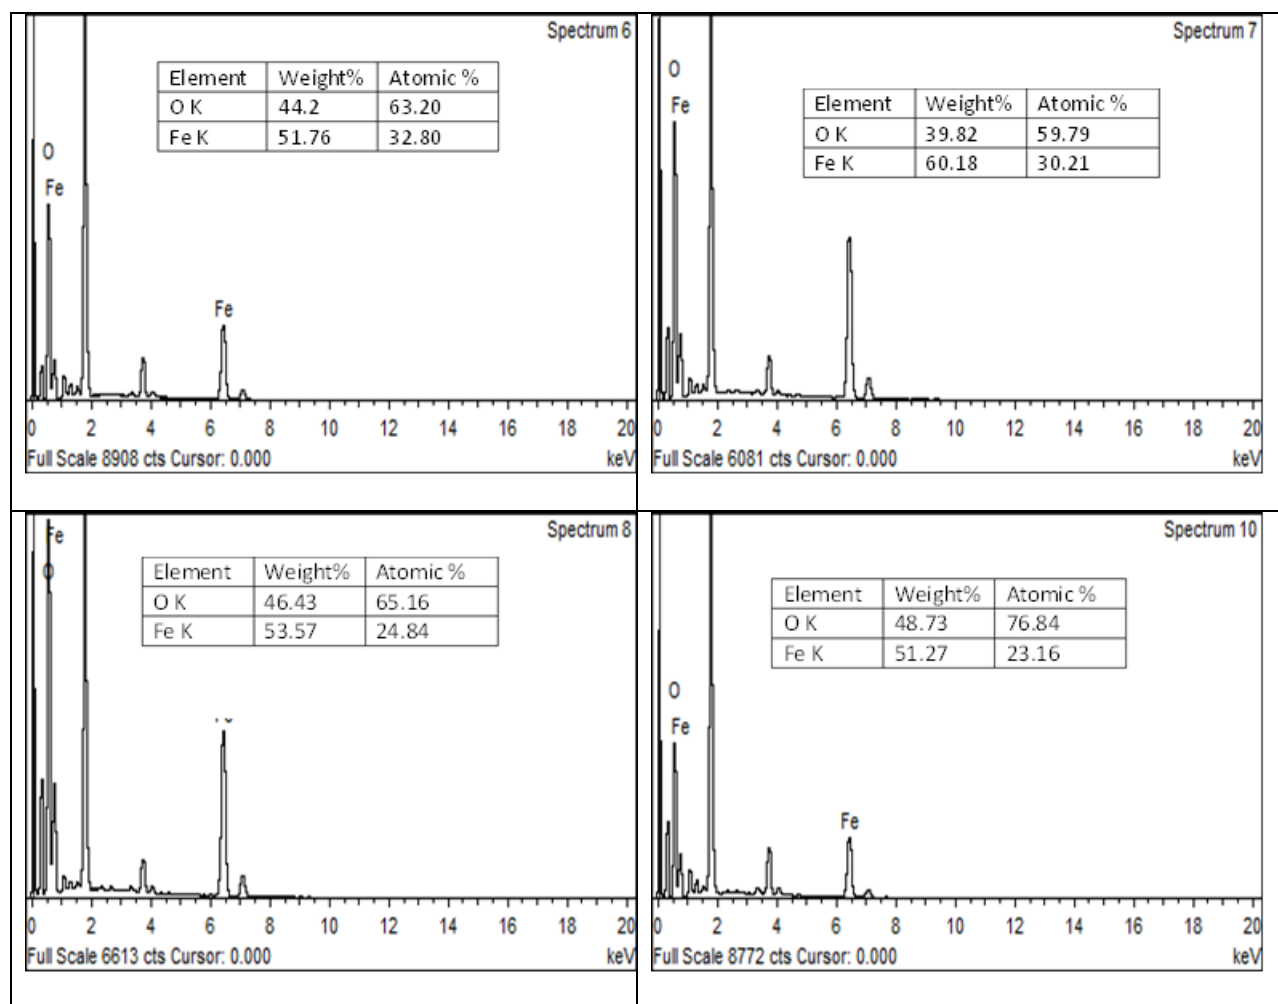

**Figure S3** The surface composition of naked SPIONs was designated by energy-dispersive X-ray spectroscopy. The presence of iron and oxygen can be seen in all of the samples, with iron abundance more than oxygen.

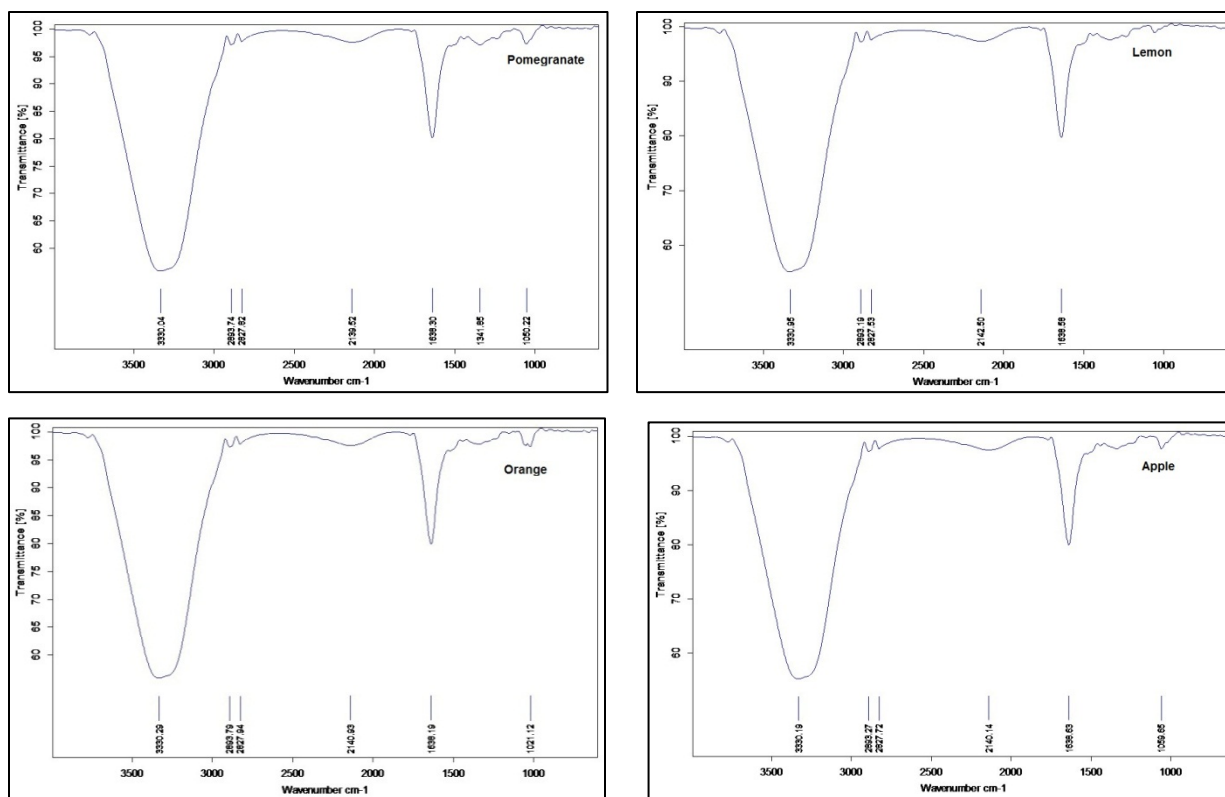

**Figure S4** FTIR spectra of peel extracts of pomegranate, lemon, orange, lemon and apple.

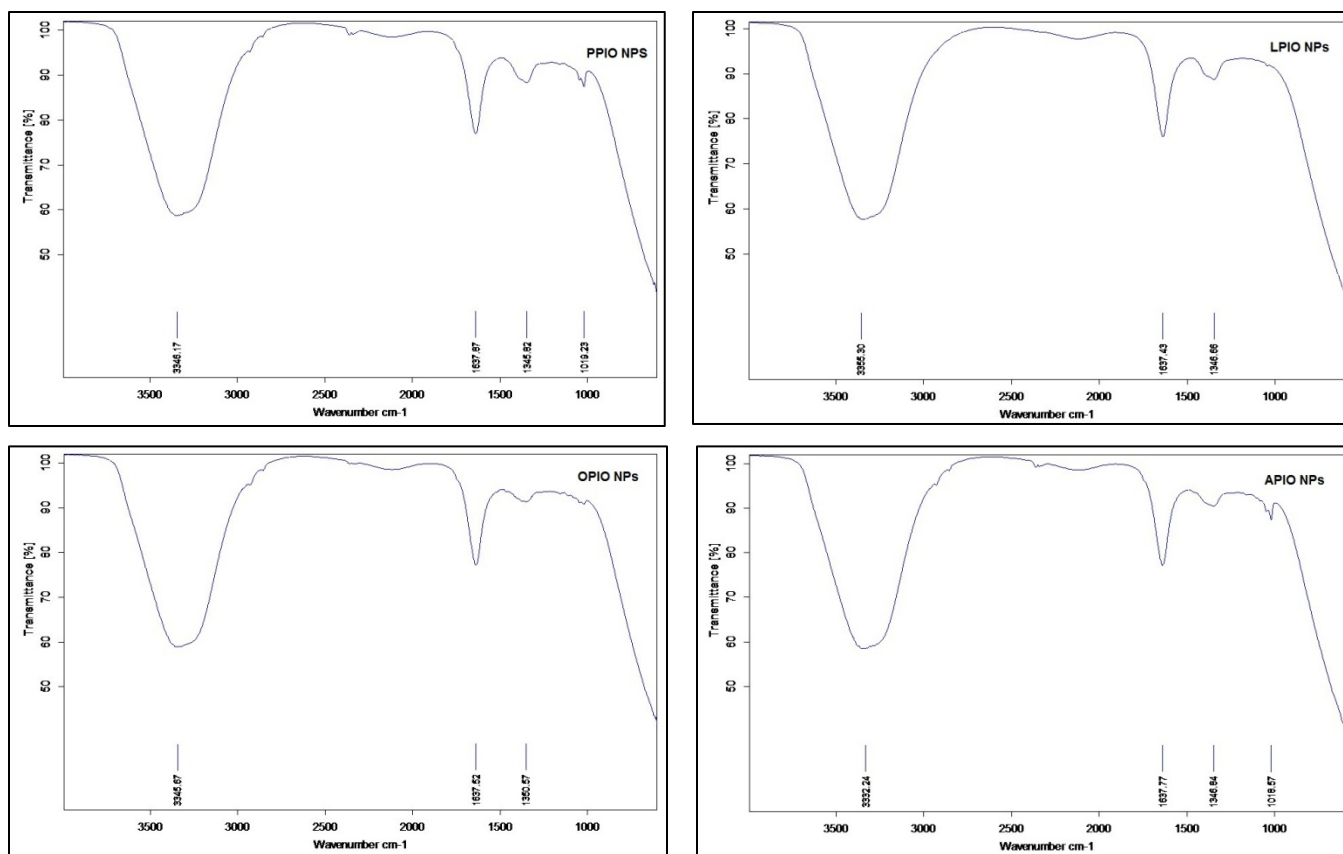

**Figure S5 (a)** FTIR spectra of PP-SPIONS, LP- SPIONS, OP- SPIONS and AP- SPIONS

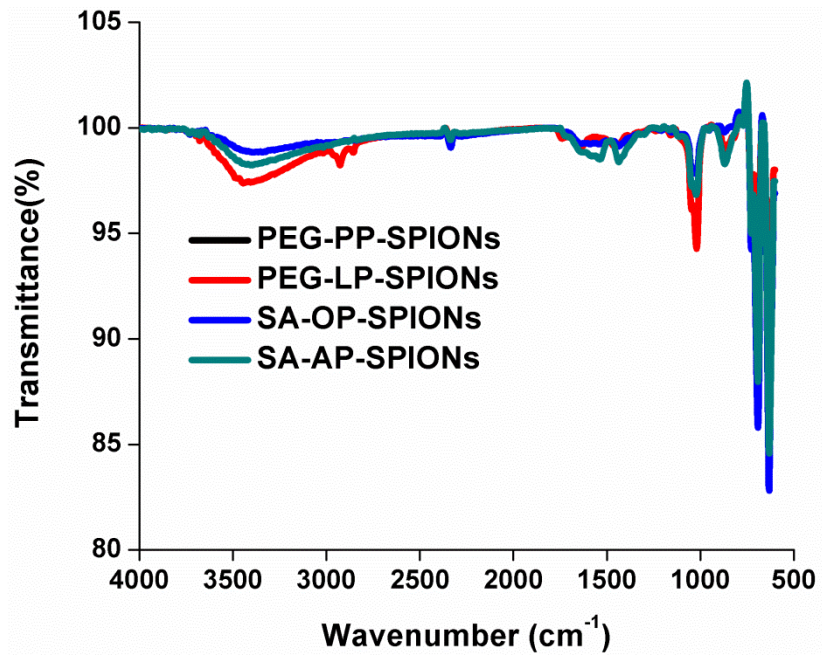

**Figure S5 (b)** FTIR spectra of (c) PEG- SPIONs and (d) SA-SPIONs functionalized through carbodiimide chemistry.



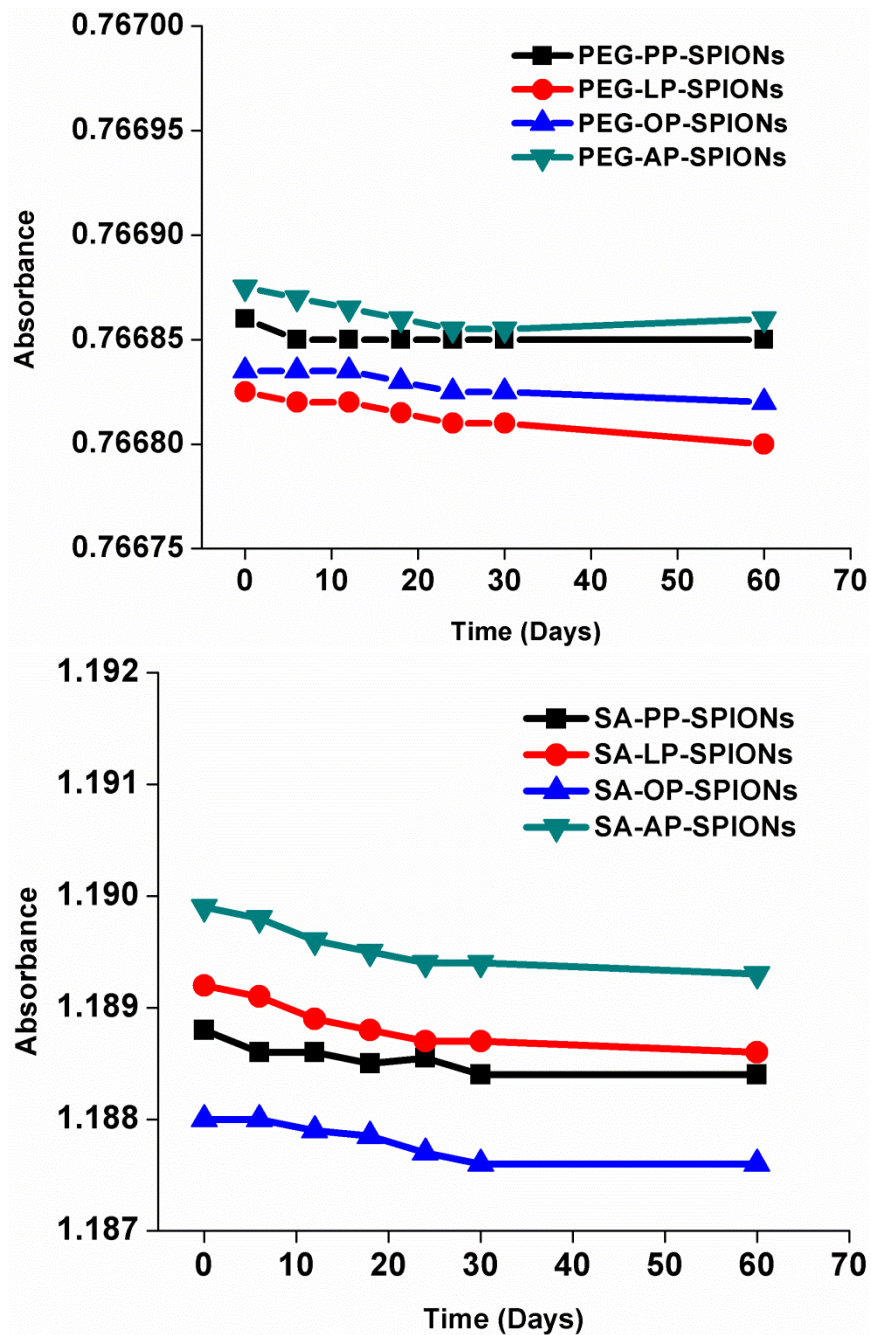

**Figure S6** Stability studies of (a) PEG-SPIONs and (b) SA-SPIONs functionalized through carbodiimide chemistry.

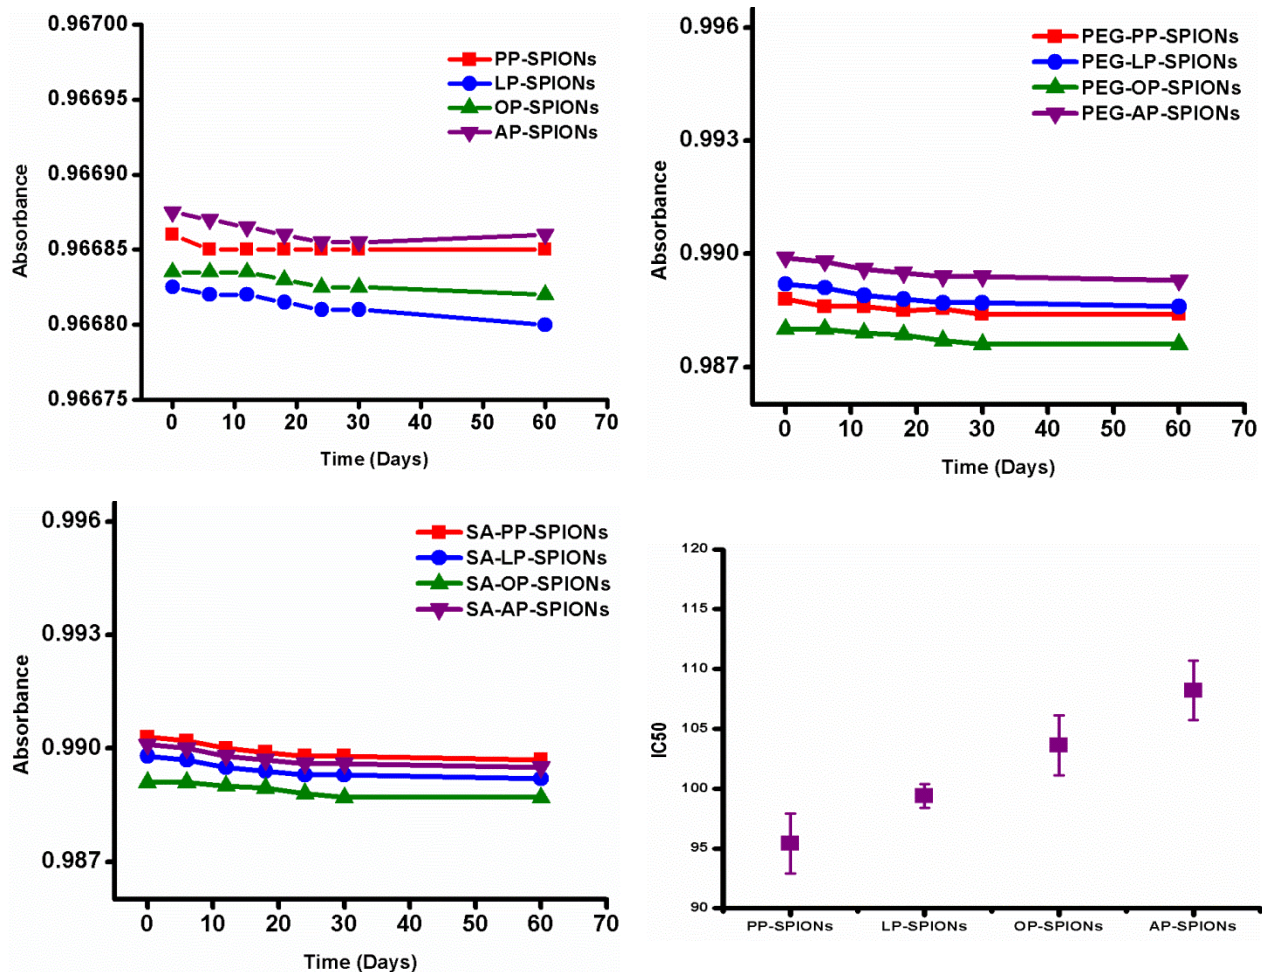

**FigureS7** Stability studies of as prepared (a) PEG-SPIONs and (b) SA-SPIONs functionalized through MW incubation (c). IC<sub>50</sub> values derived from half maximal inhibitory concentration (IC<sub>50</sub>) SPIONs against HeLa cells when exposed to light after 24 hours.

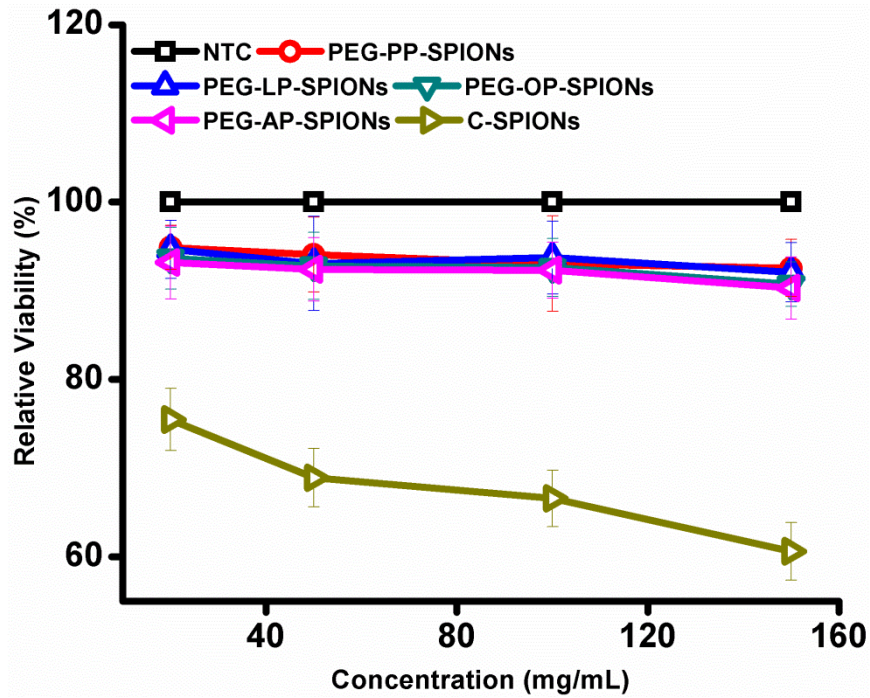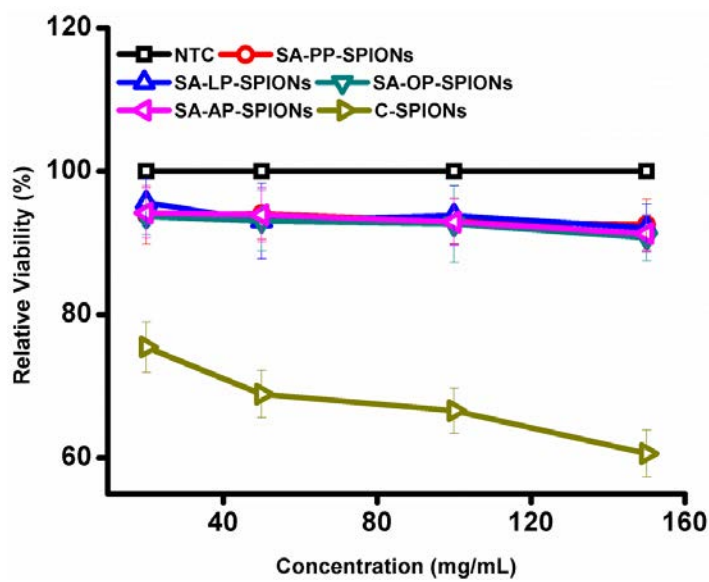

**Figure S8** Relative cell viability curve of PEG-SPIONs and SA-SPIONs functionalized through carbodiimide chemistry. Percent viabilities (mean  $\pm$  SD) were calculated ( $P < 0.05$ ; two tailed t-test).

**Table S1:** Putative Compounds in Peel Extracts found from GC/MS Analysis.<sup>1-7</sup>

| <b>Pomegranate</b>                                | <b>Lemon</b>                             | <b>Orange</b>                                       | <b>Apple</b>                                        |
|---------------------------------------------------|------------------------------------------|-----------------------------------------------------|-----------------------------------------------------|
| 2-Hydroxycyclopent-2-en-1-one                     | p-menth-1-en-4-ol (4-Terpineol)          | n-octanal                                           | 4H-Pyran-4-one, 2,3-dihydro-3,5-dihydroxy-5-methyl- |
| Glycerin                                          | $\alpha$ -Terpineol                      | 1-octanol                                           | 4H-Pyran-4-one, 3,5-dihydroxy-2-methyl-             |
| Cymene                                            | 3,7-dimethyl-6-octen-1-ol (cis-geraniol) | 3,7-dimethyl-1,6-octadien-3-ol ( $\beta$ -linalool) | 5-hydroxymethyl-2-furaldehyde                       |
| 2-Hydroxy-3-methyl-4-pyrone                       | guariol (lemonol)                        | 1-nonanol                                           | Hexadecanoic acid                                   |
| 2-Hydroxyacetylfuran                              | 2,6-dimethyl-7-octene-2,6-diol           | (R)-(-)-carvone                                     | Oleamide                                            |
| 2,3-Dihydro-3,5-dihydroxy-6-methyl-4H-pyran-4-one | thiabendazole                            | perilla aldehyde                                    | n-eicosane                                          |
| (+)-p-Menth-1-en-4-ol                             |                                          | 2-(4-methylenecyclohexyl)-2-                        |                                                     |
| Hydroxymethylfurfural                             |                                          | perilla alcohol                                     |                                                     |
| n-Nitrosoazacyclononane                           |                                          | 2,6-dimethyl-2,6-octadiene-1,8-dial                 |                                                     |
| 1-Methylhexyl acetate                             |                                          | 2-ethyl-3-hydroxyhexyl-2-methylpropanoate           |                                                     |
| Cis-Dimethyl morpholine                           |                                          | 4-isopropenyl-1-methyl-1,2-cyclohexanedial          |                                                     |
| Pyrogallol                                        |                                          | eugenol                                             |                                                     |
| Guanosine                                         |                                          | 8-hydroxylinalool                                   |                                                     |
| D-Allose                                          |                                          | (1-hydroxycyclohexyl)-phenylmethanone               |                                                     |
| L-Glucose                                         |                                          | 4-((1E)-3-hydroxy-1-propenyl)-2-methoxyphenol       |                                                     |

|                                                                                |  |                                   |  |
|--------------------------------------------------------------------------------|--|-----------------------------------|--|
| Palmitic acid                                                                  |  | tris(1-chloro-2-propyl) phosphate |  |
| Ethyl palmitate                                                                |  |                                   |  |
| Oxandrolone                                                                    |  |                                   |  |
| Cis-Oleic Acid                                                                 |  |                                   |  |
| Ethyl Oleate                                                                   |  |                                   |  |
| (2E,6E)-9-(3,3-Dimethyl-2-oxiranyl)-3,7-dimethyl-2,6-nonadienyl phenyl sulfide |  |                                   |  |
| N orolean-12-ene                                                               |  |                                   |  |
| M ethyl commate A                                                              |  |                                   |  |
| alpha.-Tocopherol-beta -Dmannoside                                             |  |                                   |  |
| gamma.-Sitosterol                                                              |  |                                   |  |
| Cycloartenol acetate                                                           |  |                                   |  |

**Table S2:** RBS analysis of SPIONs indicating the relative quantities of Fe and O in the prepared samples.

| <b>Fe<sub>3</sub>O<sub>4</sub></b> | <b>O</b>       | <b>Fe</b>      |
|------------------------------------|----------------|----------------|
| PP- SPIONs                         | 0.5936 ±0.0033 | 0.4027 ±0.0008 |
| LP- SPIONs                         | 0.6007 ±0.0068 | 0.4000 ±0.0001 |
| OP- SPIONs                         | 0.5958 ±0.0024 | 0.4017 ±0.0008 |
| AP- SPIONs                         | 0.6007 ±0.0009 | 0.4026 ±0.0053 |

**Table S3** DLS results of PEG-SPIONS and SA-SPIONS functionalized through MW incubation.

| <b>Formulation</b> | <b>Hydrodynamic size (nm)</b> |
|--------------------|-------------------------------|
| PEG-PP-SPIONS      | 82 ± 5.04                     |
| PEG-LP- SPIONS     | 70 ± 3.21                     |
| PEG-OP- SPIONS     | 65 ± 2.0                      |
| PEG-AP- SPIONS     | 56 ± 8.09                     |
| SA-PP-SPIONS       | 78 ± 2.33                     |
| SA-LP- SPIONS      | 64 ± 3.21                     |
| SA-OP- SPIONS      | 53 ± 3.32                     |
| SA-AP- SPIONS      | 45 ± 2.43                     |

**Table S4:** Rise in temperature after 10 minutes exposure on aqueous solutions of SPIONs.

| <b>Temperature in Water</b> |                     |                     |                      |
|-----------------------------|---------------------|---------------------|----------------------|
| <b>SPIONs</b>               | <b>1mg/mL ( °C)</b> | <b>5mg/mL ( °C)</b> | <b>10mg/mL ( °C)</b> |
| PP-SPIONs                   | 0.3 ± 0.003         | 1.3 ± 0.006         | 2.9 ± 0.005          |
| LP- SPIONs                  | 0.4 ± 0.006         | 1.8 ± 0.003         | 3.0 ± 0.006          |
| OP- SPIONs                  | 0.3 ± 0.002         | 1.5 ± 0.003         | 2.8 ± 0.001          |
| AP- SPIONs                  | 0.4 ± 0.004         | 1.4 ± 0.001         | 3.1 ± 0.003          |

## References

1. Bennet D, Kang SC, Gang J, Kim S. Photoprotective effects of apple peel nanoparticles. *Int J Nanomedicine*. 2014;9: 93-108.
2. Sparr Eskilsson C, Björklund E. Analytical-scale microwave-assisted extraction. *J Chromatogr A*. 2000; 902(1):227-250.
3. Kahrilas GA, Wally LM, Fredrick SJ, Hiskey M, Prieto AL, Owens JE. Microwave-Assisted Green Synthesis of Silver Nanoparticles Using Orange Peel Extract. *ACS Sustainable Chem.Eng.* 2014;2(3):367-376.
4. Fawole OA, Makunga NP, Opara UL. Antibacterial, antioxidant and tyrosinase-inhibition activities of pomegranate fruit peel methanolic extract. *BMC Complement Altern Med*. 2012;12:200-200.

5. Prasad D, Kunnaiah R. Punica granatum: A review on its potential role in treating periodontal disease. *J Indian Soc Periodontol.* 2014;18(4):428-432.
6. Fateixa S, Nogueira HIS, Trindade T. Hybrid nanostructures for SERS: materials development and chemical detection. *Phys Chem Chem Phys.* 2015;17(33):21046-21071.
7. Saravanan P, Chandramohan G, Mariajancyrani J, Shanmugasundaram P. GC-MS analysis of phytochemical constituents in ethanolic bark extract of ficus religiosa linn. *Int J Pharm Pharm Sci.* 2011;6(1):457-460.
